# Supplementary material
Source: Springer Nature journal article supplement (https://www.springermedizin.de/resource/supplementary/12887_2009_322_MOESM1_ESM.pdf/9474822)

Antisocial

60  
58  
56  
54  
52  
50  
48

0 1 2 3

Frequency/Week

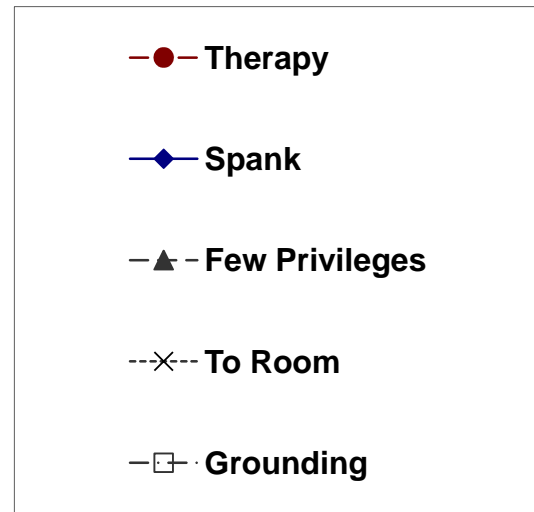

Supplement: MOESM1 [file 9474822]
